# Supplementary material
Source: PubMed Central journal article supplement (PMC9933893)
Supplement: bio-11-1067-s1.pdf [file bio-11-1067-s1.pdf]

## Supporting Information

### **Proteomic analysis via standard-flow liquid chromatography and thermal focusing electrospray ionization elucidates altered liver proteins in late stage Niemann-Pick, type C1 disease**

Melissa R. Pergande<sup>1</sup>, Estefania Zarate<sup>1</sup>, Carol Haney-Ball<sup>2</sup>, Cristin D. Davidson<sup>3</sup>, Giuseppe Scesa<sup>4</sup>,  
Maria I. Givogri<sup>4</sup>, Ernesto R. Bongarzone<sup>4</sup> and Stephanie M. Cologna<sup>1,5</sup>

#### Affiliations:

1. Department of Chemistry, University of Illinois at Chicago, Chicago, IL 60607, USA
2. Agilent Technologies, Cary, NC 27518, USA
3. Albert Einstein College of Medicine, Bronx, NY 10461, USA
4. Department of Anatomy and Cell Biology, College of Medicine, University of Illinois at Chicago, Chicago, IL, 60607, USA
5. Laboratory for Integrative Neuroscience, University of Illinois at Chicago, Chicago, IL 60607, USA

#### Correspondence:

Stephanie M. Cologna, Ph.D.

Assistant Professor

Department of Chemistry and Laboratory for Integrative Neuroscience

University of Illinois at Chicago

P: 312-413-2762

E: cologna@uic.edu

| <b>Primary Antibody</b>           | <b>MW (kDa)</b> | <b>Dilution</b>       | <b>Host</b> | <b>Vender</b>               | <b>Product Number</b> |
|-----------------------------------|-----------------|-----------------------|-------------|-----------------------------|-----------------------|
| Anti-Gapdh                        | 37              | 1:2500 WB             | Goat        | R&D Systems                 | AF5718                |
| Anti-NPC1                         | 143             | 1:1000 WB             | Rabbit      | Abcam                       | Ab134113              |
| Anti-Fabp5                        | 15              | 1:1000 WB             | Rabbit      | Cell Signaling              | D1A7T                 |
| Anti-Fabp7                        | 15              | 1:1000 WB             | Rabbit      | Abcam                       | Ab32423               |
| Anti-Limp2                        | 85              | 1:1000 WB             | Rabbit      | Abcam                       | Ab176317              |
| Anti-Lamp1                        | 120             | 1:1000 WB<br>1:600 IF | Rat         | Santa Cruz<br>Biotechnology | SC-19992              |
| Anti-Rab5b                        | 23              | 1:300 WB,<br>1:300 IF | Rabbit      | Santa Cruz<br>Biotechnology | SC-598                |
| Anti-Rab7a                        | 24              | 1:500 WB,<br>1:100 IF | Rabbit      | Abcam                       | Ab126712              |
| <b>Secondary Antibody</b>         | <b>Color</b>    | <b>Dilution</b>       | <b>Host</b> | <b>Vender</b>               | <b>Product Number</b> |
| Anti-Goat IgG<br>HRP conjugated   | -               | 1:1000                | Rabbit      | R and D<br>Systems          | HAF109                |
| Anti-Rabbit IgG<br>HRP conjugated | -               | 1:1000                | Goat        | R and D<br>Systems          | HAF008                |
| Anti- Rat IgG<br>HRP conjugated   | -               | 1:5000                | Goat        | Abcam                       | Ab97057               |
| Alexa Flour<br>Anti-Rabbit 488    | Green           | 1:1000                | Goat        | Thermo<br>Scientific        | A-11008               |
| Alexa Flour<br>Anti-Rat 546       | Red             | 1:1000                | Goat        | Thermo<br>Scientific        | A-11081               |

**Table S1. List of antibodies used for Western blot and immunofluorescence studies.**

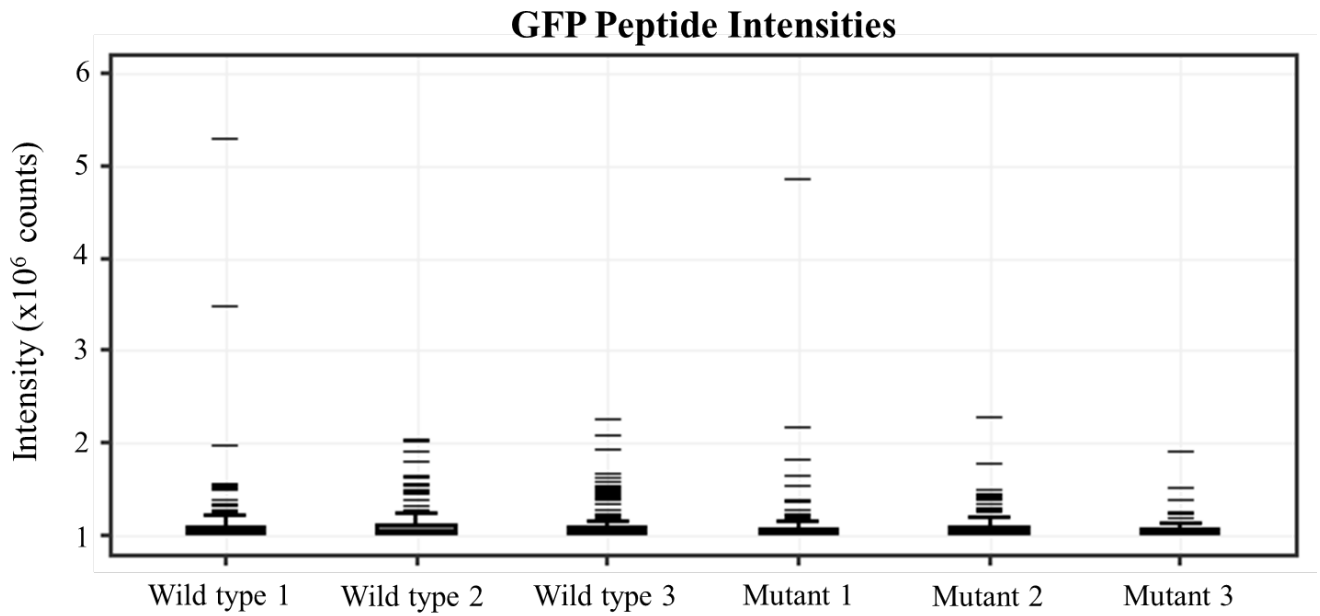

**Figure S1. Intensity of peptides measured for the internal standard (GFP protein).** LC-MS/MS data for each of the wild type and mutant technical replicates was reviewed in order to determine whether intensity normalization was needed between replicates. Here, the intensity for the measured GFP peptides were plotted and it was determined that normalization between samples was not needed as the median intensity was comparable between all replicates.

# Lysosome-Related Proteins

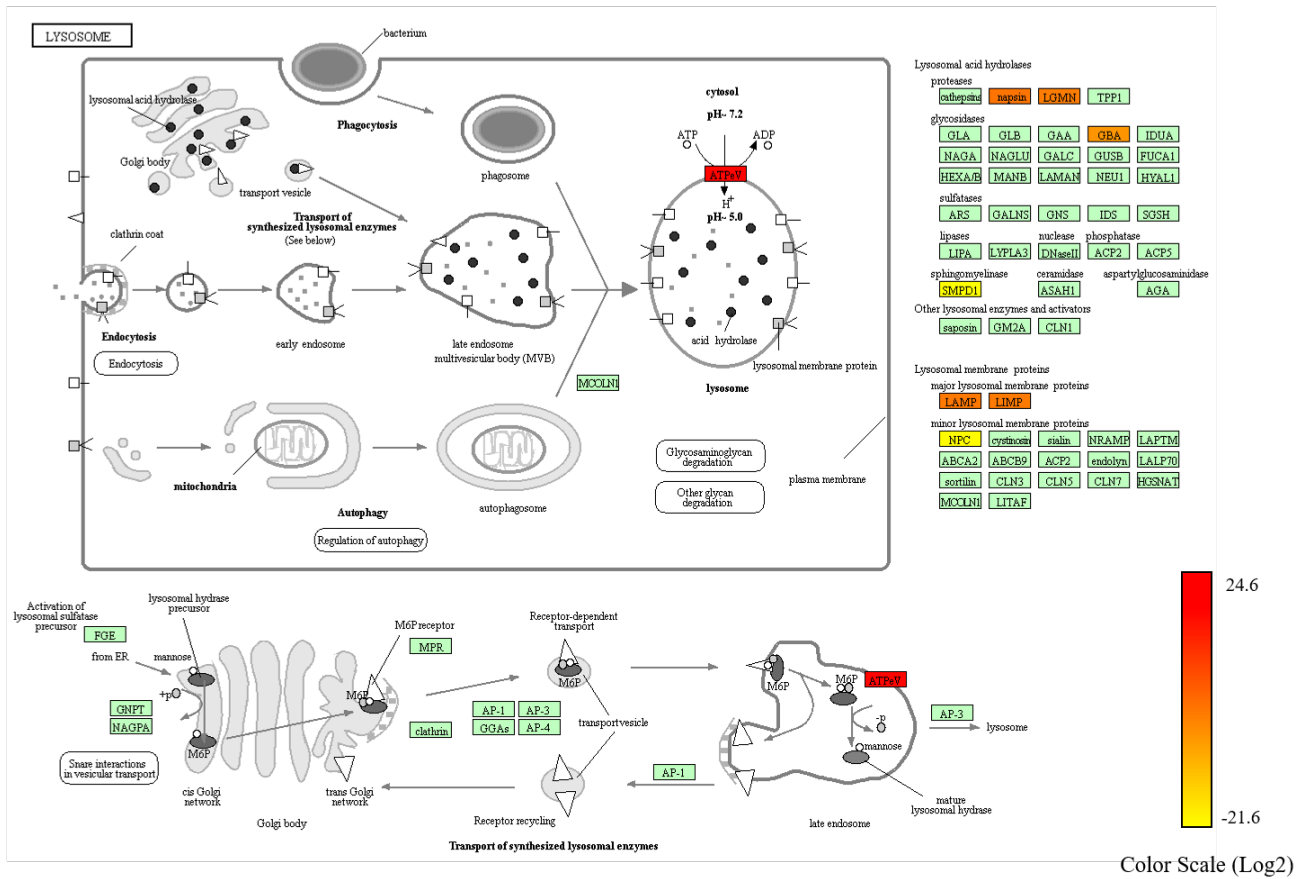

**Figure S2. KEGG pathway of analysis of lysosome-related proteins.** Differential proteins from the liver proteome were overlapped with the Lysosome KEGG pathway (04142).

## Phagolysosome Formation

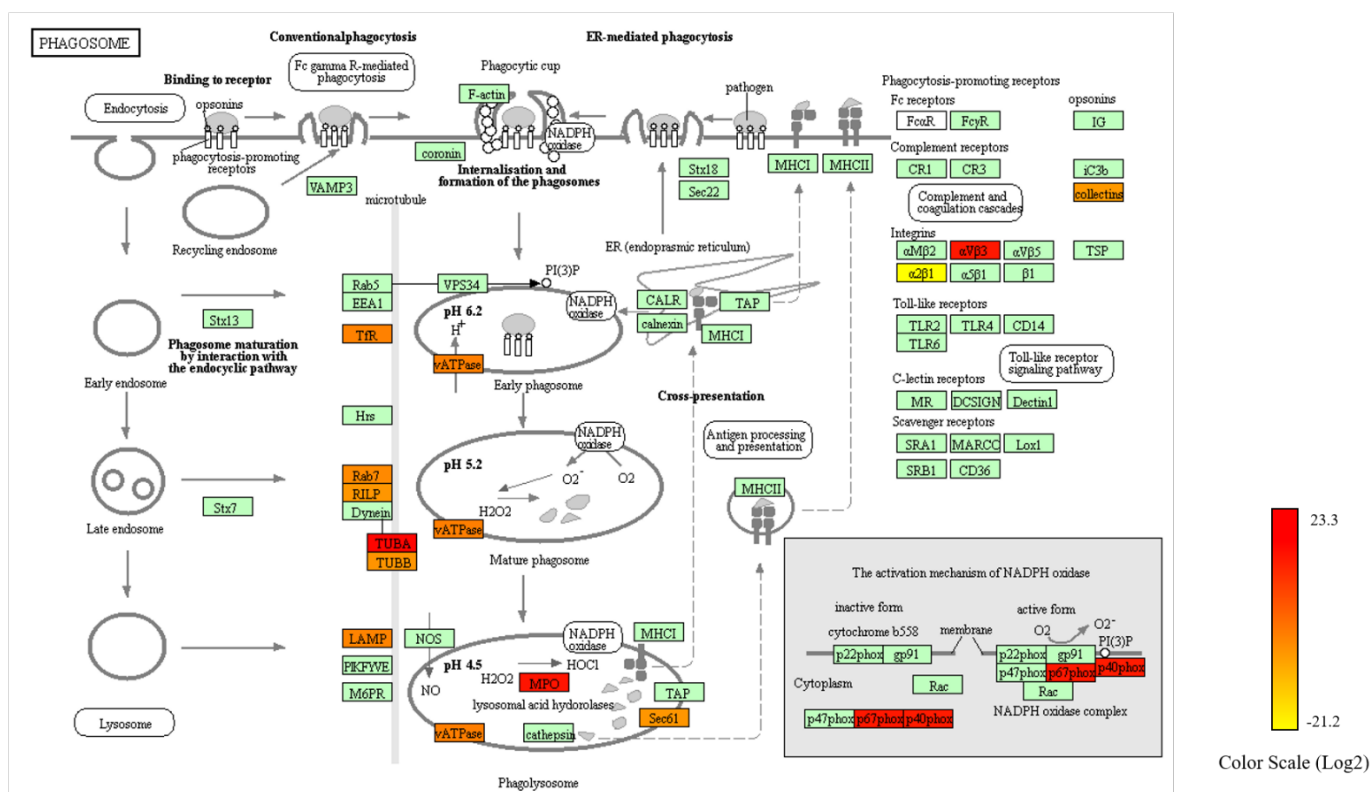

**Figure S3. KEGG pathway of analysis of phagosome biosynthesis proteins.** Differential proteins from the liver proteome were overlapped with the Phagosome Biosynthesis KEGG pathway (04146).

**A****Rab5b (+)**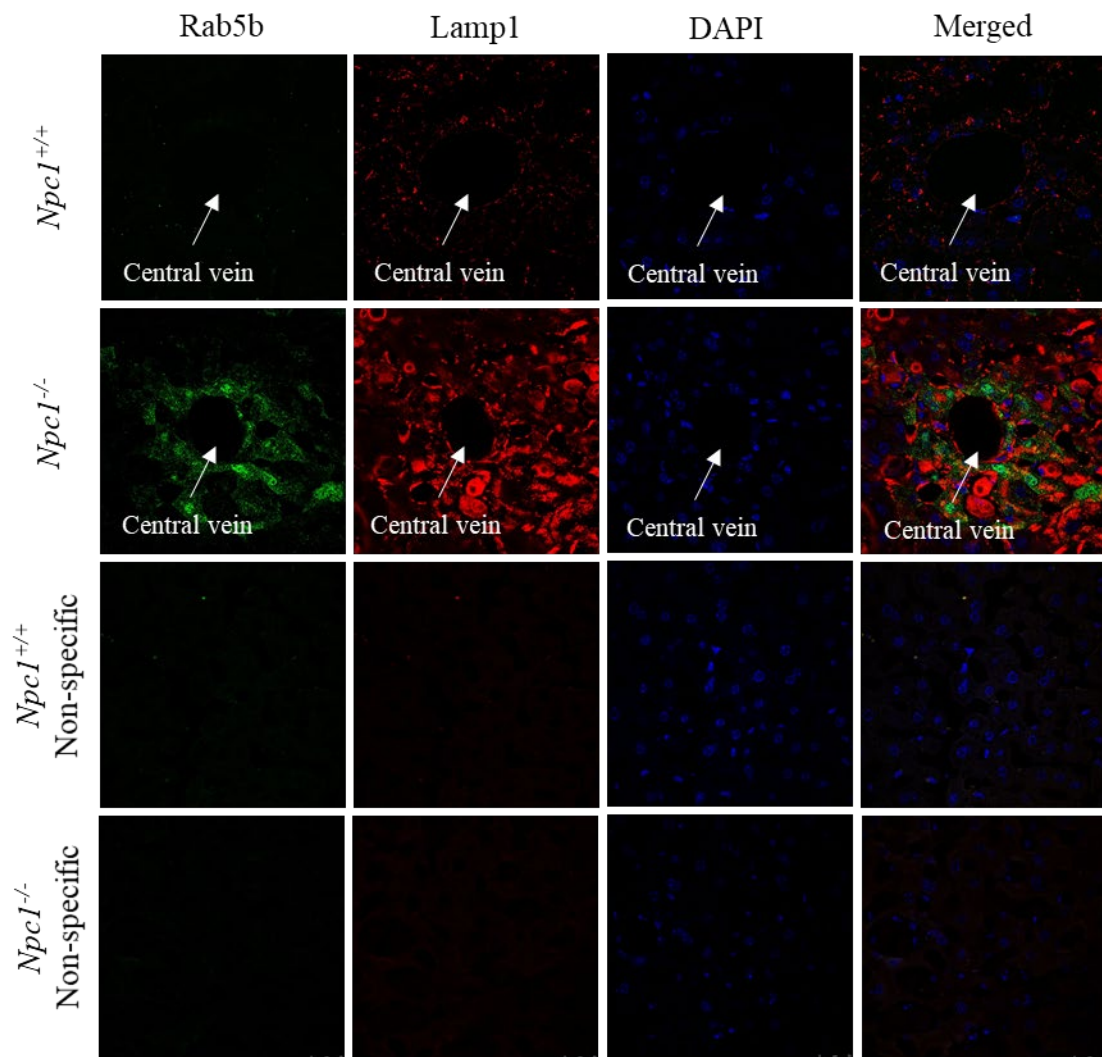

**B****Rab7a (+)**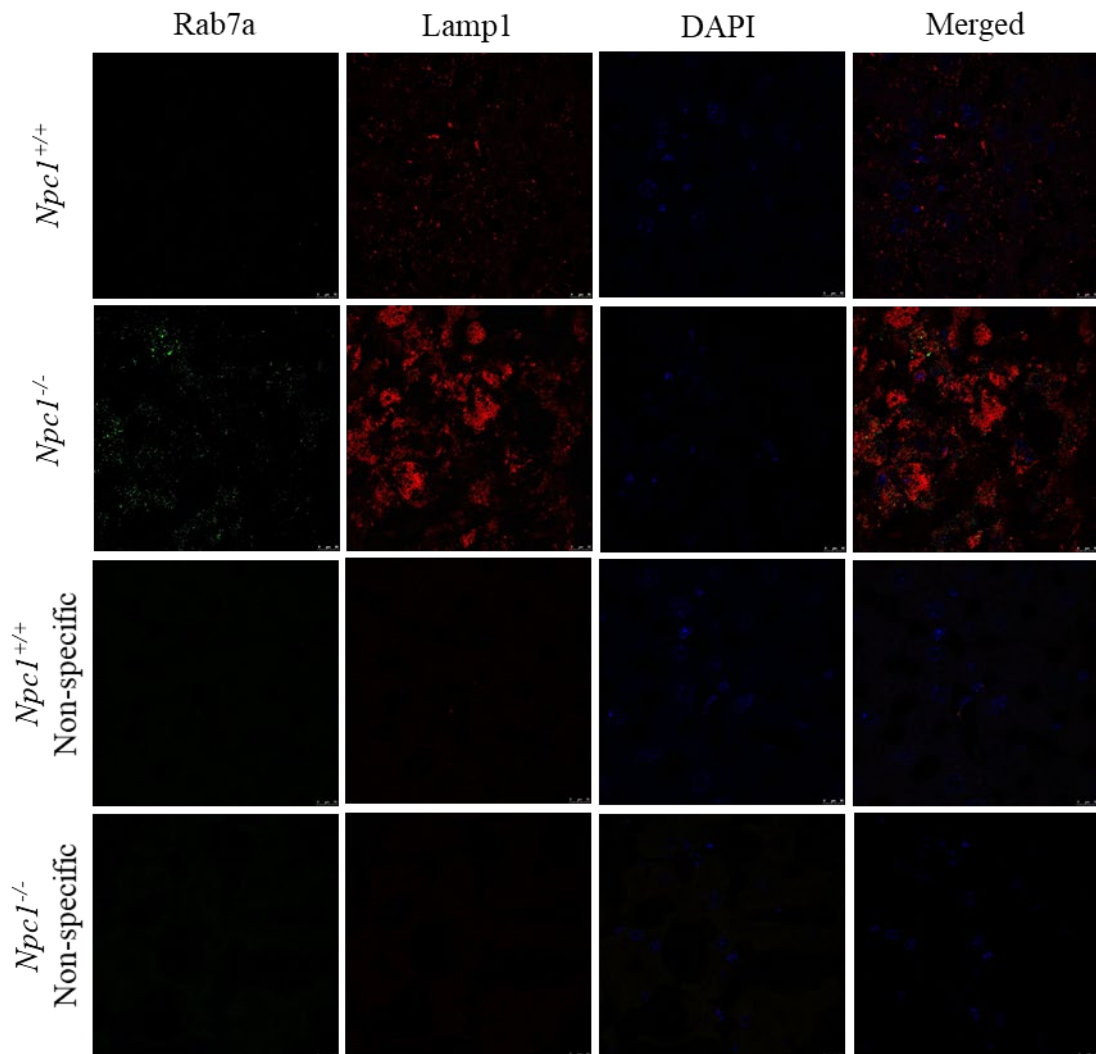

**Figure S4. Immunofluorescence images of phagosome/endosome and lysosome markers in the liver of 7-week *Npc1*<sup>+/+</sup> and *Npc1*<sup>-/-</sup> mice.** A) Magnified (63x) regions of the liver from 7-week *Npc1*<sup>+/+</sup> and *Npc1*<sup>-/-</sup> mice showing Rab5b (green, early endosome), Lamp1 (red, lysosome), and DAPI (blue, nucleus). Confocal fluorescence microscopy shows a strong increase in Lamp1 expression in *Npc1*<sup>-/-</sup> mice. Merging of the Rab5b and Lamp1 images reveals no colocalization of the two proteins. Visual inspection revealed localization of Rab5b positive vesicles around the bile duct in the *Npc1*<sup>-/-</sup> tissue. B) Magnified (63x) regions of regions of the liver from 7-week *Npc1*<sup>+/+</sup> and *Npc1*<sup>-/-</sup> mice showing Rab7a (green, late endosome), Lamp1 (red, lysosome), and DAPI (blue, nucleus). Confocal fluorescence microscopy shows a strong increase in Lamp1 expression in *Npc1*<sup>-/-</sup> mice. Merging of the Rab7a and Lamp1 images reveals no colocalization of the two proteins.

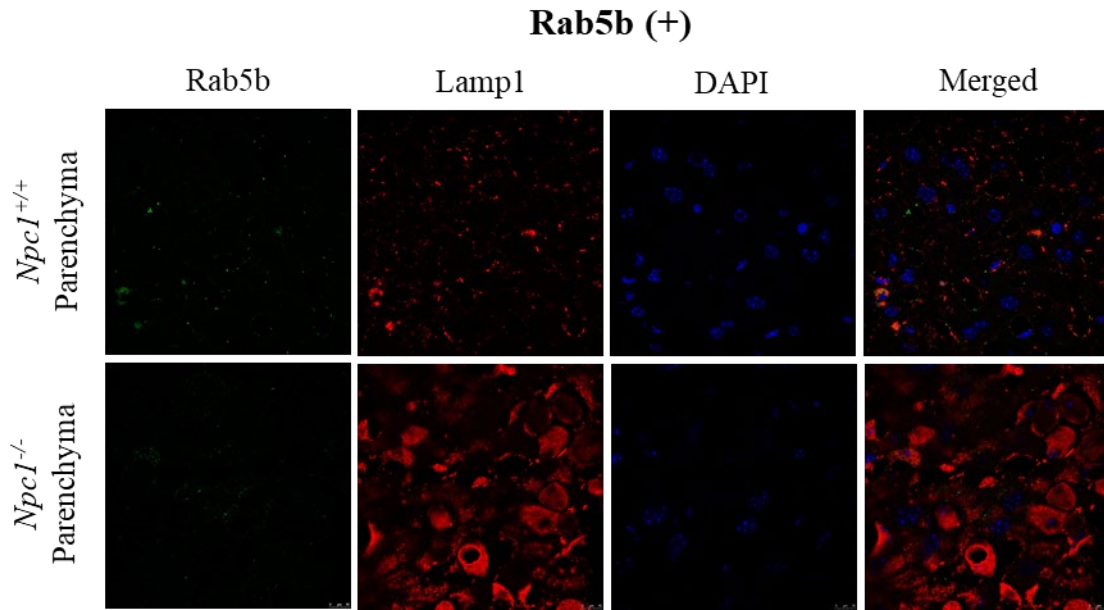

**Figure S5. Immunofluorescence images of early endosome (Rab5b) and lysosome (Lamp1) markers in the parenchyma region of the liver of 7-week *Npc1*<sup>+/+</sup> and *Npc1*<sup>-/-</sup> mice.** Magnified (63x) regions of representative parenchyma of the liver from 7-week *Npc1*<sup>+/+</sup> and *Npc1*<sup>-/-</sup> mice. Confocal fluorescence microscopy shows a strong increase in Lamp1 (red, lysosome) expression in *Npc1*<sup>-/-</sup> mice. Merging of the Rab5b (green, early endosome) and Lamp1 images reveals no colocalization of the two proteins.
